# Supplementary material for: Rice husk valorisation by in situ grown MoS2 nanoflowers: a dual-action catalyst for pollutant dye remediation and microbial decontamination
Source: Royal Society of Chemistry journal article supplement (doi:10.1039/d4ra00862f), 2024-01-01
Supplement: d4ra00862f1.pdf [file d4ra00862f1.pdf]

## Supplementary information

### Rice husk valorisation by *in-situ* grown MoS<sub>2</sub> nanoflowers: A dual-action catalyst for pollutant dye remediation and microbial decontamination

Rahul Ranjan<sup>1</sup>, Smruti B Bhatt<sup>1</sup>, Rohit Rai<sup>1</sup>, Sanju Kumari Sharma<sup>1</sup>, Rishabh Ranjan<sup>2</sup>, Ankit Bharti<sup>1</sup> and Prodyut Dhar<sup>1\*</sup>

<sup>1</sup> School of Biochemical Engineering, Indian Institute of Technology (BHU), Varanasi, Uttar Pradesh-221005, India

<sup>2</sup> Department of Biotechnology, National Institute of Technology Durgapur, West Bengal 713209

\*Corresponding author e-mail: [prodyut.bce@iitbhu.ac.in](mailto:prodyut.bce@iitbhu.ac.in)

#### **Material characterisation**

##### **Fourier transformation infrared spectroscopy (FTIR)**

The oven-dried RH, DRH, and DRH-MoS<sub>2</sub> samples were analysed using FTIR spectroscopy in Attenuated Total Reflection mode. The analysis used a Nicolet iS5 instrument from THERMO Scientific US in the 500-4000 cm<sup>-1</sup> range. The samples were gently placed directly onto the diamond crystal, pressed using a knob, and scanned 64 times, with the spectra recorded at a resolution of 4 cm<sup>-1</sup>.

##### **X-ray photoelectron spectroscopy (XPS)**

The chemical composition of DRH-MoS<sub>2</sub> and DRH was analysed using a PHI5000 Versaprobe III scanning XPS microprobe instrument. The sample was initially fixed on a holder before being placed inside the analysis chamber. Narrow scans had a step size of 0.1 eV, while survey scans had a step size of 1 eV. The investigation used an Al-K<sub>α</sub> anode, a 400 μm beam spot size, and a binding energy range of -10 eV to 1350 eV. The experiment was conducted under vacuum, with pressures ranging from 10<sup>-8</sup> to 10<sup>-9</sup> mbar. The obtained spectra were analysed

1 using MultiPak 9.9 version (ULVAC-PHI), and deconvolution of the peaks was carried out  
2 using Origin software (2023b).

### 3 **X-ray diffraction (XRD)**

4 The synthesised composite DRH-MoS<sub>2</sub> and DRH powder was subjected to XRD analysis using  
5 MiniFlex 600 (Bench Top XRD instrument, Rigaku, Japan). The powdered samples were then  
6 evenly distributed onto aluminium holders with a flat glass spreader. Cu-k<sub>α</sub> radiation is  
7 generated from a copper anticathode used for the analysis and operated at 40 kV voltage and  
8 20 mA current. Scanning was done from 2 (θ) angles ranging from 5° to 90° at a scan rate of  
9 5° per minute and a step size of 0.02. The *Segal equation* (eq.1), *Bragg's equation* (eq.2), and  
10 *Scherrer equation* (eq.3) were used to calculate the crystallinity index (*CI*) and the distance  
11 between crystal planes (*d*-spacing) and crystal size (*D*), respectively.

$$12 \quad CI = \frac{I_{002} - I_{am}}{I_{002}} \quad (\text{eq.1})$$

$$13 \quad n\lambda = 2d\sin\theta \quad (\text{eq.2})$$

$$14 \quad D = \frac{k\lambda}{\beta \cos\theta} \quad (\text{eq.3})$$

15 diffraction peak *I*<sub>002</sub> corresponds to the crystalline plane, while the intensity peak *I*<sub>am</sub> represents  
16 the peak for the amorphous region at an angle of 2θ around 18.6°. The symbol λ represents the  
17 wavelength of Cu K<sub>α</sub> radiation, and *n* signifies the number of wavelengths. The parameter *d*  
18 refers to the spacing between two adjacent layers of atoms.

### 19 **Scanning electron microscopy (SEM)**

20 A Carl Zeiss SEM (ZEISS EVO) instrument from Germany was used to examine the  
21 morphological properties of the DRH and DRH-MoS<sub>2</sub> composites at an accelerated voltage of  
22 10 kV. The samples were carefully mounted on double carbon tape before being coated with a

1 layer of gold and palladium using a desk sputter coater (DSR1, United Kingdom). For 200  
2 seconds, the coating process was carried out under a vacuum of 200 torrs. Image J software  
3 was used to determine the particle size distribution of the MoS<sub>2</sub> component. Further, Energy  
4 Dispersive Spectroscopy (EDXS, USA) was used to analyse the elements present on the sample  
5 surfaces (at an accelerated voltage of 10 kV) and mapped using Team Basic software for  
6 studying the distribution of in-situ grown MoS<sub>2</sub> within the DRH.

### 7 **Adsorption kinetics**

8 The kinetic model is a mathematical representation of the relationship between the extent of  
9 contact and the amount of adsorbate adsorbed onto the adsorbent. Pseudo-first-order kinetic  
10 (eq.5) and pseudo-second-order kinetic (eq.6) models were used to investigate the interaction  
11 of the solid adsorbent (DRH and DRH-MoS<sub>2</sub>) and the liquid adsorbate (MG dye), as well as  
12 calculate the rate of adsorption. The active sites on the adsorbent have the most significant  
13 influence on the adsorption rate, providing insights into the behaviour and mechanism of the  
14 adsorption process. Both models' linear equations are provided below.

$$15 \quad \log(Q_e - Q_t) = \log Q_e - k_1 t \quad (\text{eq.4})$$

$$16 \quad \frac{t}{Q_t} = \frac{1}{k_2 Q_e^2} + \frac{1}{Q_e} t \quad (\text{eq.5})$$

17 Where  $Q_e$  and  $Q_t$  (mg/g) is the amount of MG (mg) adsorbed on DRH and DRH-MoS<sub>2</sub> at  
18 equilibrium and at any time (t),  $k_1$  (min<sup>-1</sup>) and  $k_2$  (g mg<sup>-1</sup> min<sup>-1</sup>) are the rate Pseudo-first-order  
19 kinetic and pseudo-second-order kinetic models respectively.

### 20 **Adsorption isotherm**

21 Adsorption primarily concerns transferring dyes from a liquid phase (aqueous solution) to a  
22 solid phase (adsorbent). The transfer process can be described mathematically using  
23 equilibrium adsorption isotherms, which present the interaction between the dye and the

1 adsorbent surface. As a result, Langmuir and Freundlich isotherms (eq. 6 and 7) were  
2 investigated, and mathematical representations of both isotherms are provided:

$$3 \frac{C_e}{Q_e} = \frac{1}{Q_0 b} + \frac{1}{Q_0} C_0 \quad (\text{eq.6})$$

$$4 \log Q_e = \log K_F + \frac{1}{n} \log C_e \quad (\text{eq.7})$$

5 where  $Q_0$  (mg/g) and  $b$  is the adsorption constant or the maximum adsorptive capacity for  
6 Langmuir isotherm and adsorption rate respectively.  $K_F$  is Freundlich isotherm constant and  
7  $n$  is the sign for describing the favourability of the adsorption process.

### 8 Adsorption thermodynamic

9 Adsorption thermodynamics was used to determine the characteristics of the adsorption  
10 process, such as whether it was endothermic or exothermic and whether it followed a  
11 spontaneous or non-spontaneous mechanism. The thermodynamic properties of the adsorption  
12 process, such as Gibbs free energy ( $\Delta G^\circ$ ), enthalpy ( $\Delta H^\circ$ ), and entropy ( $\Delta S^\circ$ ), were calculated  
13 using equation (9) and equation (10), and a plot of  $\ln k_c$  against  $1/T$  was generated. The universal  
14 gas constant ( $R$ ) is 8.314 J/mol. K and the absolute temperature expressed in Kelvins ( $T$ ) were  
15 used in these calculations.

$$16 \Delta G^\circ = -RT \ln k_c \quad (\text{eq.8})$$

$$17 \ln k_c = \frac{\Delta S^\circ}{R} - \frac{\Delta H^\circ}{RT} \quad (\text{eq.9})$$

### 18 UV-visible diffused reflection spectra (DRS)

19 The UV-visible diffused reflection spectra (DRS) analysis of DRH- MoS<sub>2</sub> was conducted  
20 utilizing the Lambda 750 spectrophotometer, PerkinElmer, USA. The determination of the  
21 band gap for DRH-MoS<sub>2</sub> was carried out using Tauc equation (eq.12).

$$1 \quad \alpha h\nu = A(h\nu - E_g)^n \quad (\text{eq. 10})$$

2 where, ' $\alpha$ ' represents the absorption coefficient, ' $h\nu$ ' corresponds to photon energy, ' $E_g$ '  
 3 signifies the bulk optical band gap, and ' $n$ ' is assigned a value of 2 for an indirect band gap.  
 4 ' $A$ ' remains a constant in the equation.

### 5 **Antioxidant activity of the DRH-MoS<sub>2</sub>**

6 The DPPH free radical scavenging experiments were performed according to the literature by  
 7 Hong et al.<sup>1</sup>. Firstly, 0.3 Mm DPPH was prepared in ethanol. Different concentrations of DRH-  
 8 MoS<sub>2</sub> (0.1-0.25 mg/ml) were prepared in both ethanol and distilled water and sonicated for 1  
 9 min at 27°C. 0.5 mL of prepared DRH-MoS<sub>2</sub> samples were mixed in 0.5 mL DPPH solution  
 10 and incubated in the dark for 30 minutes. The percentage of DPPH inhibition of the sample  
 11 was calculated using equation 11.

$$12 \quad \text{DPPH inhibition percent} = \left[ 1 - \left( \frac{A_s - A_b}{A_c} \right) \right] \times 100 \quad (\text{eq.11})$$

13 The absorbance of DPPH in ethanol is represented as  $A_c$ , while  $A_b$  signifies the absorbance of  
 14 the sample in the absence of DPPH, and  $A_s$  is the absorbance of the sample in the presence of  
 15 DPPH after a 30-minute dark incubation.

16

17 **Table S1:** Represents the elemental composition of DRH and DRH-MoS<sub>2</sub> determined through  
 18 XPS spectroscopic studies.

| <b>DRH-MoS<sub>2</sub></b> |                   |
|----------------------------|-------------------|
| <b>Element</b>             | <b>Atomic (%)</b> |
| <b>C</b>                   | 50.05             |
| <b>O</b>                   | 38.66             |
| <b>Si</b>                  | 6.89              |
| <b>S</b>                   | 3.36              |
| <b>Mo</b>                  | 1.05              |
| <b>DRH</b>                 |                   |
| <b>C</b>                   | 53.3              |

|           |       |
|-----------|-------|
| <b>O</b>  | 36.78 |
| <b>Si</b> | 9.9   |
| <b>S</b>  | -     |
| <b>Mo</b> | 0.02  |

1

2 **Table S2:** Crystal structure properties of RH, DRH and DRH-MoS<sub>2</sub> determined through XRD.

| Name of sample             | 2 $\theta$ | C.I.   | Crystallite size (in nm) | d-spacing (in nm) |
|----------------------------|------------|--------|--------------------------|-------------------|
| <b>RH</b>                  | 16.4       | 45.63% | 0.039                    | 0.532             |
|                            | 22.2       |        | 0.023                    | 0.404             |
| <b>DRH</b>                 | 16.4       | 51.30% | 0.04                     | 0.537             |
|                            | 22.2       |        | 0.027                    | 0.401             |
| <b>DRH-MoS<sub>2</sub></b> | 16.4       | 30%    | 0.012                    | 0.514             |
|                            | 22.2       |        | 0.0190                   | 0.401             |

3

4 **Table S3:** Represents pseudo first-order and pseudo second order kinetic parameters for the  
5 adsorption of MG onto DRH.

| Concentration (mg/L) | Pseudo-first-order kinetic |       | Pseudo-second-order kinetic |       |
|----------------------|----------------------------|-------|-----------------------------|-------|
|                      | $K_1$                      | $R^2$ | $K_2$                       | $R^2$ |
| <b>100</b>           | 0.01221                    | 0.99  | 0.000872                    | 0.88  |
| <b>200</b>           | 0.00599                    | 0.94  | 0.000378                    | 0.92  |
| <b>400</b>           | 0.01245                    | 0.98  | 0.003087                    | 0.99  |
| <b>600</b>           | 0.01147                    | 0.98  | 0.000162                    | 0.77  |
| <b>1000</b>          | 0.03157                    | 0.95  | 0.00024                     | 0.81  |

6

| Langmuir isotherm |          |       | Freundlich isotherm |       |              |
|-------------------|----------|-------|---------------------|-------|--------------|
| $R^2$             | $B$      | $Q_0$ | $R^2$               | $K_F$ | $1/n$ or $n$ |
| <b>0.98979</b>    | 0.017714 | 80.45 | 0.91661             | 2.25  | 0.40 or 2.5  |

7 **Table S4:** Details of the adsorption isotherm parameters for DRH

8

1

2 **Table S5:** Represents the adsorption thermodynamic parameter for DRH

| Temperature | $\Delta G^\circ$ | $\Delta S^\circ$ | $\Delta H^\circ$ |
|-------------|------------------|------------------|------------------|
| 303.13      | -2.16            | 65.89 kJ/mol     | 0.22 kJ/K.mol    |
| 308.13      | -3.38            |                  |                  |
| 313.13      | -6.88            |                  |                  |
| 318.13      | -7.19            |                  |                  |
| 323.13      | -10.58           |                  |                  |

3

4

5

6 **Table S6:** List of pseudo first-order and pseudo second-order kinetic parameters of DRH-MoS<sub>2</sub>  
7 for photodegradation of MG at different concentrations.

8

| Concentration<br>(mg/L) | Pseudo-first-order kinetic |       | Pseudo-second-order kinetic |       |
|-------------------------|----------------------------|-------|-----------------------------|-------|
|                         | $K_1$                      | $R^2$ | $K_2$                       | $R^2$ |
| 100                     | 0.06245                    | 0.81  | 0.000441                    | 0.99  |
| 200                     | 0.08172                    | 0.87  | 0.008768                    | 0.99  |
| 400                     | 0.03163                    | 0.75  | 0.016214                    | 0.99  |
| 600                     | 0.04246                    | 0.82  | 0.015195                    | 0.99  |
| 1000                    | 0.07917                    | 0.96  | 0.067943                    | 0.99  |
| 2700                    | 0.05461                    | 0.93  | 0.051987                    | 0.99  |

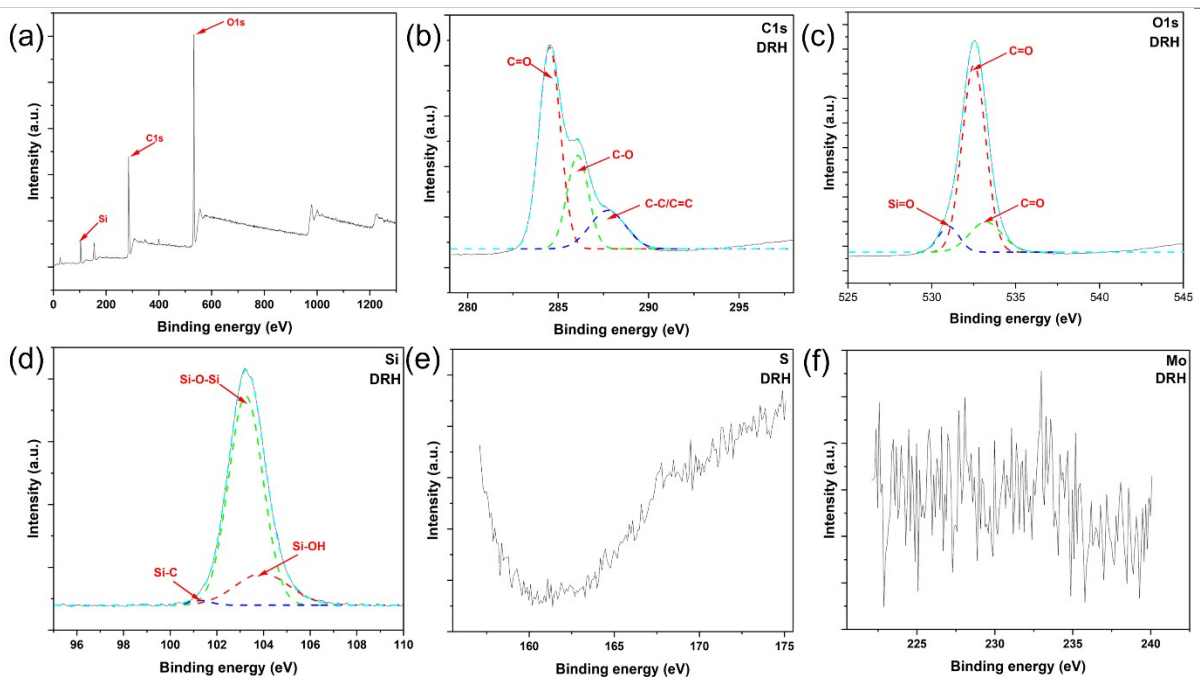

9

1 **Figure S1:** XPS survey a broad spectrum of DRH, with a small scan section of (d) C1s, (e)  
2 O1s, (f) Si2p, (g) S2p and (h) Mo3d of DRH.

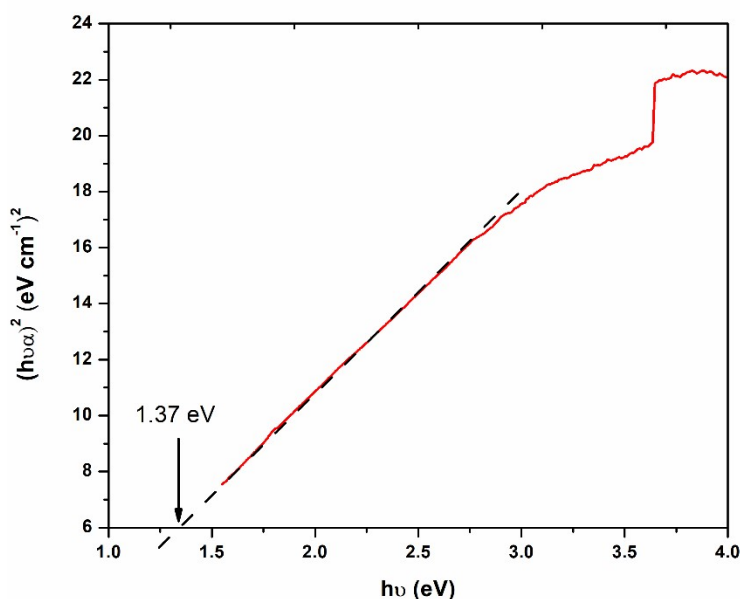

3

4 **Figure S2:** UV-visible DRS spectra of DRH-MoS<sub>2</sub> catalyst.

4

#### 5 **Effect of time on the formation of MoS<sub>2</sub> on DRH**

6 MoS<sub>2</sub> grown at the optimized temperature reported in our previous study using sugarcane  
7 biomass at 195°C for 18 hours was selected for this study with slight modification. On utilizing  
8 DRH as substrate for *in-situ* synthesis of MoS<sub>2</sub>, we found that after 17 hours of reaction at  
9 195°C, the white colour of DRH turn to grey and in the SEM image sheet or flower like  
10 morphologies was not discovered. However, after 18 hours of reaction at 195°C, DRH colour  
11 turns to light black but still the nanosheets or nanoflower like morphologies were absent in the  
12 SEM micrographs. After 19 hours of reaction at 195°C, DRH turns to complete black and  
13 nanoflower like morphologies were observed in SEM micrographs of MoS<sub>2</sub> (**Figure S3**). From  
14 these results we confirmed the growth and formation of MoS<sub>2</sub> nanoflowers on to the  
15 microstructures of DRH which occurs at 195°C for 18 hours.

16

17



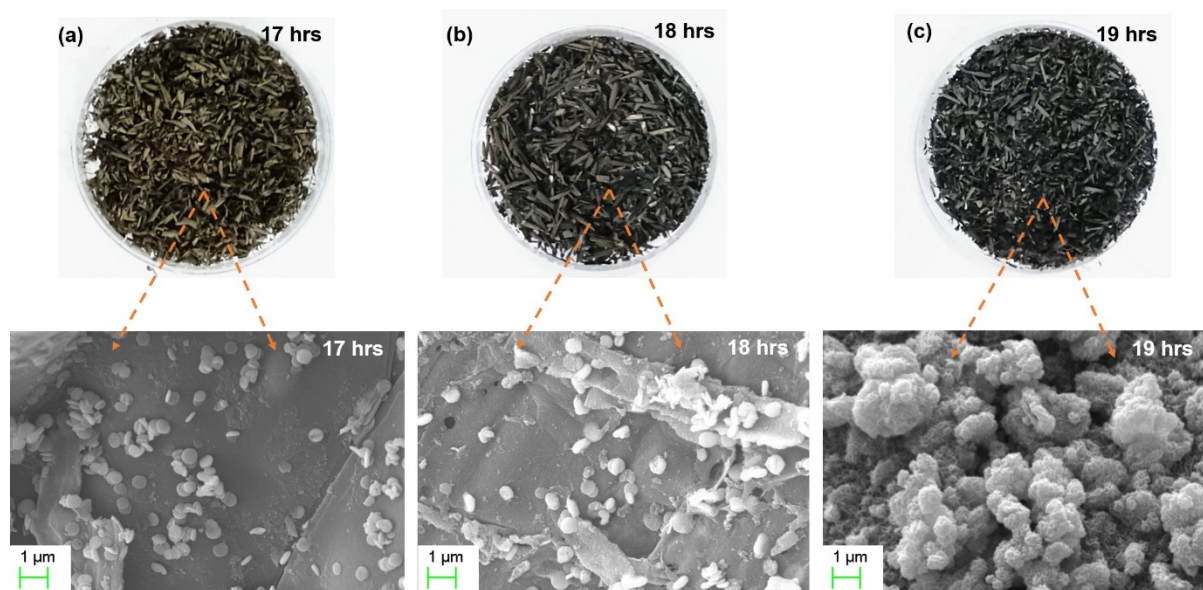

1  
2  
3 **Figure S3:** Represent the photograph and SEM image of samples prepared at 195°C (a) 17  
4 Hrs, (b) 18 Hrs, and (c) 19 hrs.

5  
6  
7 **Table S7:** FTIR table of RH, DRH, and DRH-MoS<sub>2</sub>

8  
9

| Wavenumber (cm <sup>-1</sup> ) | Functional group                      | Ref. |
|--------------------------------|---------------------------------------|------|
| 796                            | Si-O                                  | 2    |
| 1066                           | Si-O-Si stretching vibrations         | 3    |
| 1632                           | C=O stretching vibration              | 4    |
| 3425                           | Bending vibration of -OH              | 5    |
| 2896                           | C-H stretching                        | 6    |
| 1616                           | C=C bond of aromatic carbon of lignin | 7    |
| 1736                           | C=O stretching of acetyl groups       | 8    |
| 560                            | Mo-S bond                             | 9    |
| 664                            | O-Mo-O bond                           | 10   |
| 1107                           | S-S bond                              | 11   |
| 1432                           | C-H bond                              | 12   |

10  
11  
12  
13  
14  
15  
16  
17  
18  
19  
20  
21  
22  
23  
24  
25

26 **Table S8:** Comparison of present work and summary of dye degradation capabilities of MoS<sub>2</sub>  
 27 and its composite from literature, encompassing details on dosage quantity, percent degradation  
 28 of dyes, process parameters and duration.  
 29

| Catalyst                                                 | Reaction time and temperature | Catalyst used | Dye and concentration                  | Removal efficiency   | Time (min) | Ref.      |
|----------------------------------------------------------|-------------------------------|---------------|----------------------------------------|----------------------|------------|-----------|
| MoS <sub>2</sub>                                         |                               | 5 g           | Rhodamine-B (20 mg/L)                  | 96%                  | 40 min     | 13        |
| MoS <sub>2</sub> /Mg(OH) <sub>2</sub> /BiVO <sub>4</sub> | 180 °C for 24 h               | 0.08 g        | Congo red and MG (20 ppm)              | 95% and 97%          | 60 min     | 14        |
| MoS <sub>2</sub>                                         | 24 hrs, 180°C                 | 0.4 g/L       | Rhodamine-B (20 ppm)                   | 100%                 | 30 min     | 15        |
| PANI-CS @MoS <sub>2</sub>                                |                               | 0.1 g         | Rhodamine-B (30 mg/L) and MG (50 mg/L) | 96.2% and 91.5%      | 60 min     | 16        |
| BC/MoS <sub>2</sub>                                      | 4 hrs, 121°C                  | 5 mg/L        | MG 100 mmol                            | 95%                  | 10 min     | 17        |
| MoS <sub>2</sub>                                         | 24 hrs, 180°C                 | 10 mg         | Methylene blue (20 mg/L)               | 98%                  | 30 min     | 18        |
| gC <sub>3</sub> N <sub>4</sub> @CS-MoS <sub>2</sub>      | 24 hrs, 180 °C                | 60 mg         | Rhodamine-B (50 mg/L)                  | 99.6%                | 50 min     | 19        |
| 3D-MoS <sub>2</sub> /FeCo <sub>2</sub> O <sub>4</sub>    | 12 hrs, 110 °C                | -             | Rhodamine-B (30 mg/L)                  | 89.3%                | 10 min     | 20        |
| MoS <sub>2</sub> -FeS <sub>2</sub>                       | 24 hrs, 200 °C                | 2.5 mg        | Methylene blue (20 mg/L)               | 100% upto 500 mL     | 30 min     | 21        |
| Cel/MoS <sub>2</sub>                                     | 16 hrs, 210 °C                | 10 mg         | Rhodamine-B (10 μM)                    | ~ 97%                | 30 min     | 22        |
| M-G-CFP                                                  | 24 hrs, 200 °C                | 30 mg         | Methylene blue (100-300 mg/L)          | 94%                  | 400 min    | 23        |
| BC/MoS <sub>2</sub> hybrid aerogel                       | 24 hrs, 140-215°C             | -             | Methylene blue (100-300 mg/L)          | 96%                  | 120 min    | 24        |
| 3D cellulose-MoS <sub>2</sub> aerogel                    | 24 hrs, 180 °C                | 250 mg        | Congo red                              | 334.92 mg/g          | 60 min     | 25        |
| FSC-wood                                                 | 24 hrs, 180 °C                | 0.6 mg/L      | Tetracycline (20 mg/L)                 | 100 %                | 120 min    | 26        |
| DRH-MoS <sub>2</sub>                                     | 20 hrs, 195 °C                | 200 MG        | MG                                     | 100% (upto 500 mg/L) | 240 min    | This work |

30  
 31  
 32  
 33

**Table S9: Represent free radical scavenging activity of DRH-MoS<sub>2</sub>**

| <b>DRH-MoS<sub>2</sub> concentration (mg/L)</b> | <b>DPPH radical scavenging activity (%)</b> |
|-------------------------------------------------|---------------------------------------------|
| <b>0.05</b>                                     | 43.52                                       |
| <b>0.1</b>                                      | 49.87                                       |
| <b>0.15</b>                                     | 57.71                                       |
| <b>0.2</b>                                      | 66.75                                       |
| <b>0.25</b>                                     | 74.20                                       |

## 36 References

37

- 38 1 L. Hong, J. Li, F. Liu, S. Huang, B. Zheng, X. Ma, Q. Zhang, B. Zhao and C. Yang,  
39 *Colloids and Surfaces A: Physicochemical and Engineering Aspects*, 2020, **596**, 124722.
- 40 2 W. Guo, G. Li, Y. Zheng and K. Li, *RSC Advances*, 2021, **11**, 34915–34922.
- 41 3 F. Unglaube, C. R. Kreyenschulte and E. Mejía, *ChemCatChem*, 2021, **13**, 2583–2591.
- 42 4 S. Azat, A. V. Korobeinyk, K. Moustakas and V. J. Inglezakis, *Journal of Cleaner  
43 Production*, 2019, **217**, 352–359.
- 44 5 Y. Li, Y. Zhou, R. Wang, Z. Chen, X. Luo, L. Wang, X. Zhao, C. Zhang and P. Yu, *Food  
45 Chemistry*, 2022, **389**, 132987.
- 46 6 T. N. Ang, G. C. Ngoh, A. S. M. Chua and M. G. Lee, *Biotechnology for Biofuels*, 2012, **5**,  
47 67.
- 48 7 S. Yue, C. Cui, K. Wei, Y. Jiang, Z. Bai, J. Ma, C. N. K. Patabendige and C. Jiang,  
49 *International Journal of Energy Research*, 2022, **46**, 9822–9835.
- 50 8 L. S. Monte, V. A. Escócio, A. M. F. de Sousa, C. R. G. Furtado, M. C. A. M. Leite, L. L.  
51 Y. Visconte and E. B. A. V. Pacheco, *Biomass Conv. Bioref.*, 2018, **8**, 189–197.
- 52 9 M. Maqsood, S. Afzal, A. Shakoor, N. A. Niaz, A. Majid, N. Hassan and H. Kanwal, *J  
53 Mater Sci: Mater Electron*, 2018, **29**, 16080–16087.
- 54 10 D. Tang, J. Li, Z. Yang, X. Jiang, L. Huang, X. Guo, Y. Li, J. Zhu and X. Sun, *Chemical  
55 Engineering Journal*, 2022, **428**, 130954.
- 56 11 S. Singh, S. Sharma, B. S. Bajwa and I. Kaur, *Journal of Environmental Chemical  
57 Engineering*, 2022, **10**, 108883.
- 58 12 N. T. Nguyen, N. T. Tran, T. P. Phan, A. T. Nguyen, M. X. T. Nguyen, N. N. Nguyen, Y.  
59 H. Ko, D. H. Nguyen, T. T. T. Van and D. Hoang, *Journal of Industrial and Engineering  
60 Chemistry*, 2022, **108**, 150–158.
- 61 13 B. Joshi, A. M. E. Khalil, S. Zhang, F. A. Memon and Z. Yang, *ACS Eng. Au*, 2023, **3**,  
62 461–476.
- 63 14 D. Karthigaimuthu, S. Ramasundaram, P. Nisha, B. Arjun Kumar, J. Sriram, G.  
64 Ramalingam, P. Vijaibharathy, T. H. Oh and T. Elangovan, *Chemosphere*, 2022, **308**,  
65 136406.
- 66 15 R. Mohammed, M. E. M. Ali, S. M. Abdel-Moniem and H. S. Ibrahim, *Nano-Structures &  
67 Nano-Objects*, 2022, **31**, 100900.
- 68 16 P. Sirajudheen, S. Vigneshwaran, V. C. R. Kasim, M. C. Basheer and S. Meenakshi,  
69 *International Journal of Biological Macromolecules*, 2023, **249**, 126008.
- 70 17 H. Shen, S. Liao, C. Jiang, J. Zhang, Q. Wei, R. A. Ghiladi and Q. Wang, *Carbohydrate  
71 Polymers*, 2022, **277**, 118853.
- 72 18 M. T. Leng Lai, K. Mun Lee, T. C. Kuang Yang, G. Ting Pan, C. Wei Lai, C.-Y. Chen, M.  
73 Rafie Johan and J. Ching Juan, *Nanoscale Advances*, 2021, **3**, 1106–1120.
- 74 19 M. Nikitha, S. SD. Elanchezhiyan and S. Meenakshi, *Environmental Research*, 2023, **238**,  
75 117032.
- 76 20 C. Huang, H. Liu, C. Sun, P. Wang, Z. Tian, H. Cheng, S. Huang, X. Yang, M. Wang and  
77 Z. Liu, *Environmental Pollution*, 2023, **325**, 121391.
- 78 21 H. Ashrafi, F. Rahnama, M. Akhond and G. Absalan, *Inorg. Chem.*, 2022, **61**, 1118–1129.
- 79 22 N. Tavker and M. Sharma, *Journal of Environmental Management*, 2020, **255**, 109906.
- 80 23 A. Gopalakrishnan, S. Pratap Singh and S. Badhulika, *New Journal of Chemistry*, 2020,  
81 **44**, 5489–5500.
- 82 24 E. P. Ferreira-Neto, S. Ullah, T. C. A. da Silva, R. R. Domenegueti, A. P. Perissinotto, F.  
83 S. de Vicente, U. P. Rodrigues-Filho and S. J. L. Ribeiro, *ACS Appl. Mater. Interfaces*,  
84 2020, **12**, 41627–41643.

- 85 25 S. Qiu, H. Zhang, M. Sang, F. Liu and G. Nie, *Water Air Soil Pollut*, 2023, **234**, 401.
- 86 26 W. Zhang, X. Wang, D. Wang, J. Shu, Z. Ye, X. Zhang, L. Ran, Q. Zhao, B. Zou and L.
- 87 Zhou, *Cellulose*, 2022, **29**, 5079–5101.
